# Supplementary material
Source: PubMed Central journal article supplement (PMC8943697)
Supplement: NIHMS1788700-supplement-supplemental_files.pdf [file NIHMS1788700-supplement-supplemental_files.pdf]

**Molecular Cell, Volume 81**

**Supplemental information**

**Alternative splicing is a developmental  
switch for hTERT expression**

**Alex Penev, Andrew Bazley, Michael Shen, Jef D. Boeke, Sharon A. Savage, and Agnel Sfeir**

**Supplemental Items:**

Figure S1

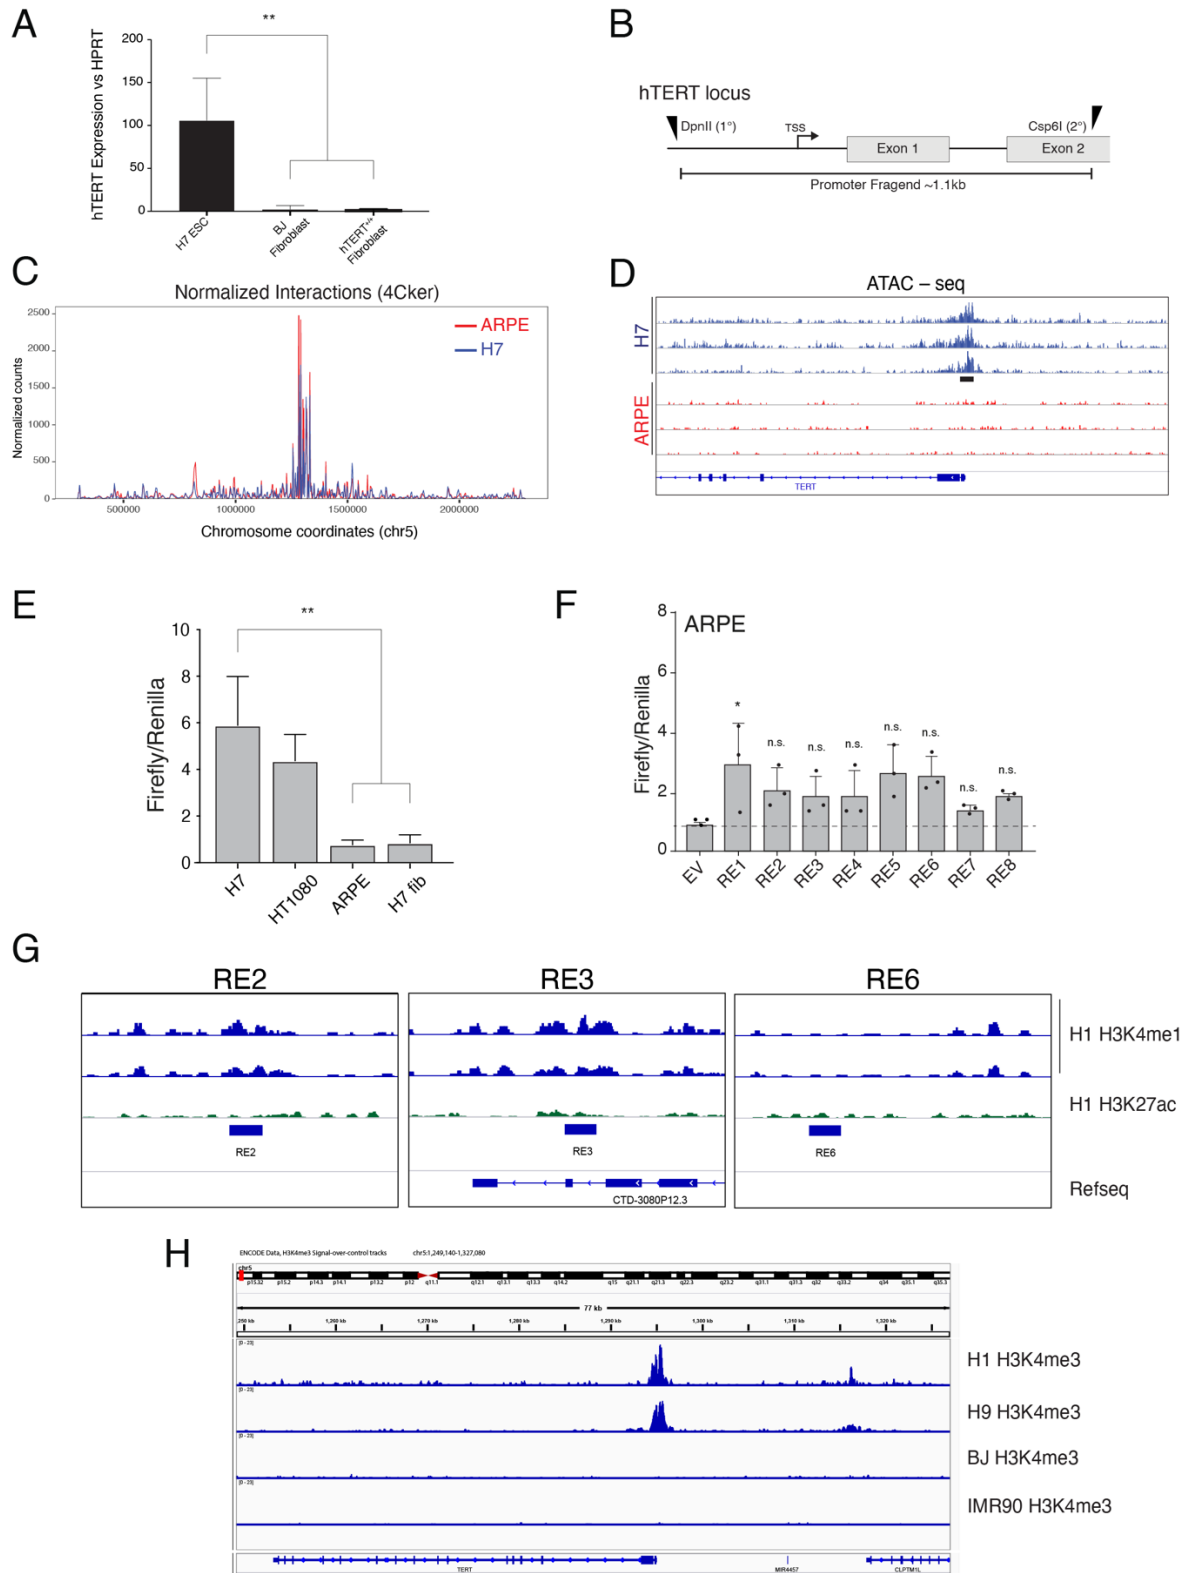

**Figure S1. Identification of *hTERT* cis REs. Related to Figure 1.** (A) RT-qPCR for *hTERT* levels in H7 human ESCs and in mortal human BJ fibroblasts. (B) Schematic of 1.1kb "fragend" containing the *hTERT* promoter defined by DpnII and Csp6I cut sites used in 4C experiment. (C) 4C-seq analysis derived from embryonic stem cells (H7, blue) and epithelial cells (ARPE, red) demonstrating the logarithmic decay of signal away from *hTERT* transcription start site (bait). (D) ATAC-seq profile from H7 ESC (blue) and ARPE (red) cells centered around *hTERT* promoter region. (E) Bar graph depicting the ratio of Firefly to Renilla luciferase activity driven by *hTERT* core promoter in the indicated cell lines (n=3 biological replicates, statistics calculated using student's t-test). ESCs display the highest baseline of *hTERT* promoter activity while mortal cell lines, including ARPE and differentiated fibroblasts, have low baseline activity. (F) Bar graph of Firefly to Renilla luciferase signal elicited when reporters carrying the indicated putative REs were transfected into ARPE cells (n=3 biological replicates, statistics calculated using ANOVA with multiple comparisons to empty vector (EV) values). None of the putative REs resulted in a significant difference in the *hTERT* promoter activity in ARPE cells. (G) Signal-over-control tracks displaying ENCODE-database ChIP-seq data for canonical enhancer histone marks, H3K4me1 and H3K27ac, in H1 ESC cells at putative enhancers RE2 and RE3 (H3K4me1). Data submitted to ENCODE. (H) As a control for histone marks at *hTERT* promoter in pluripotent cells vs differentiated cells, we show signal-over-control tracks displaying ChIP-seq data for H3K4me3, in the indicated cells types. Data from ENCODE.

## Figure S2

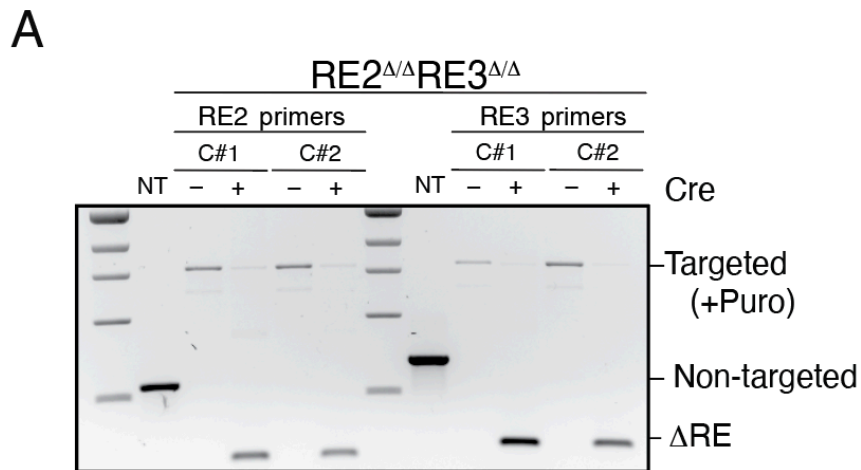

**Figure S2. Deletion of *hTERT* enhancers reduce telomerase expression in embryonic stem cells. Related to Figure 2. (A)** Genotyping PCR on RE2 and RE3 DKO cells with the indicated Cre-treatment and primers. PCR products (RE2/RE3): wild type, 560/700bp; targeted, 1500/1700bp and null alleles, 250/300bp.

Figure S3

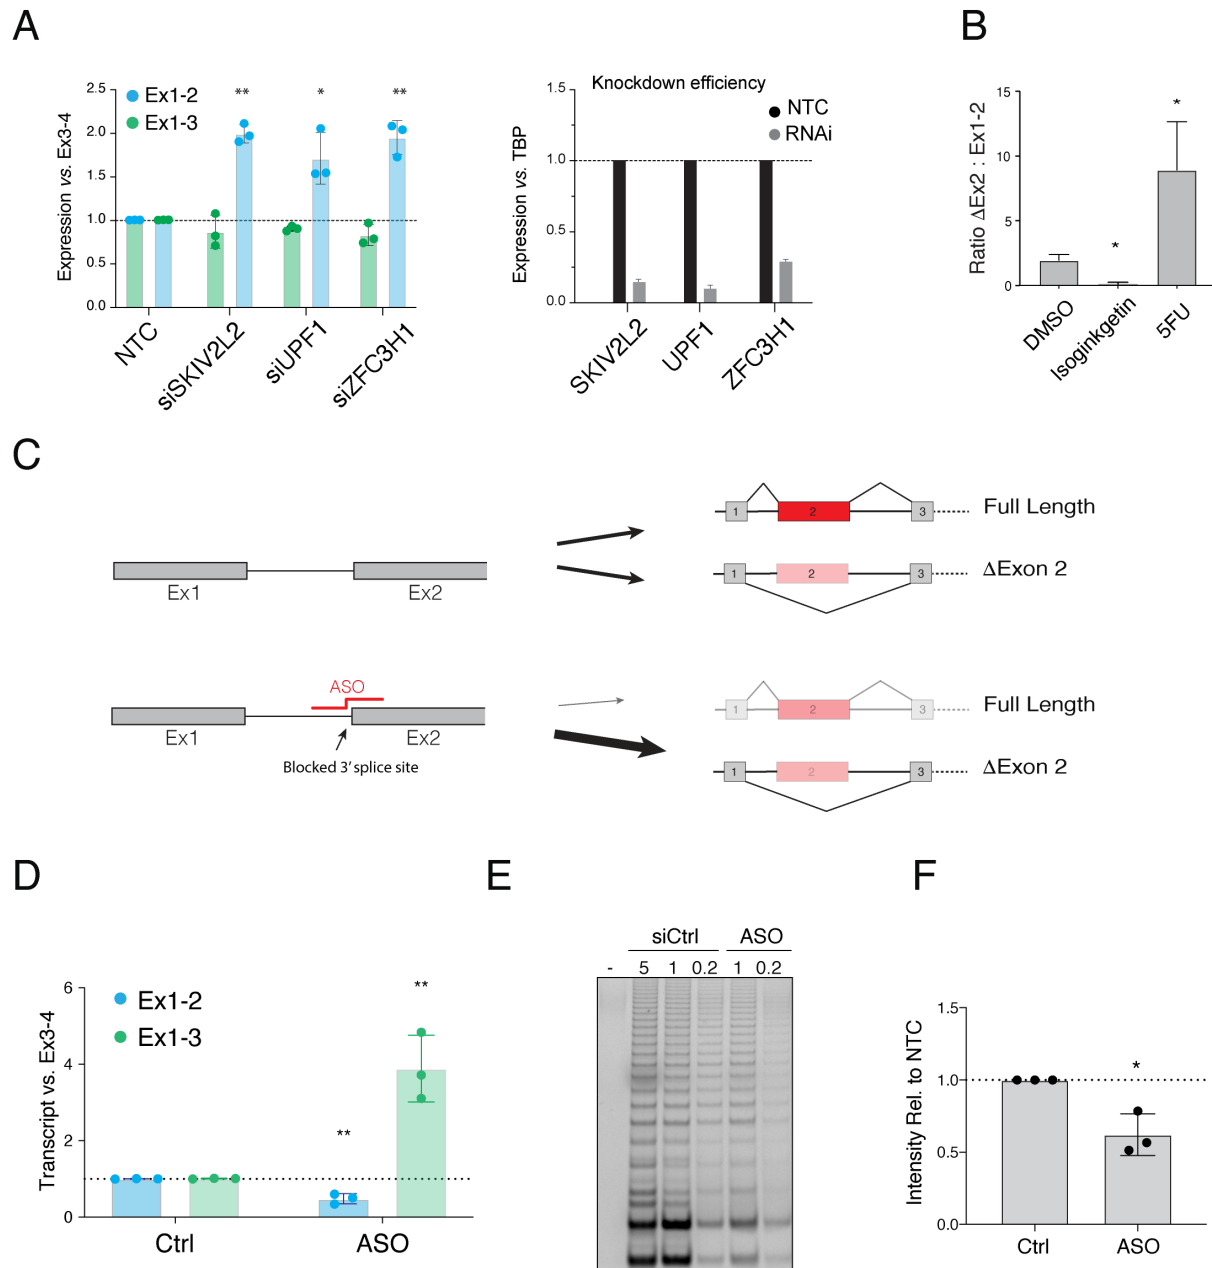

**Figure S3. Characterization of *hTERT*  $\Delta$ Exon2 splice variant in somatic vs. pluripotent cells. Related to Figure 3. (A) Left: Quantification of *hTERT* exon1-2 and exon1-3 splice-junctions normalized to non-alternatively-spliced junction, exon3-4, in HeLa cells upon knockdown of the RNA decay factors, SKIV2L2, ZFC3H1 and UPF1. Depletion of these factors in HeLa cells increases abundance of exon1-3 splice junctions while abundance of *hTERT* exon1-2 junctions are largely unaffected (n=3 biological replicates, \*:p<0.05, \*\*:p<0.01, statistics**

calculated using ANOVA with multiple comparisons to NTC values). Right: efficiency of decay factor depletion by RNAi in HeLa by qPCR. **(B)** Quantification of the abundance of hTERT-ΔEx2 relative to hTERT full-length using quantitative RT-PCR in ARPE treated with isoginkgetin (general pre-mRNA splicing inhibitor), 5-fluorouracil (RNA decay inhibitor), and DMSO control. Inhibition of global splicing decreased the ratio of hTERT-ΔEx2 to full-length. On the other hand, inhibition of RNA decay increased the ratio of hTERT ΔEx2 to full-length (n=3 biological replicates, p<0.05, statistics calculated using student's t-test comparing each condition to DMSO control). **(C)** Schematic illustration of anti-sense oligo (ASO) used to block the 3' splice site and inhibit the binding of the splicing machinery to hTERT transcript. **(D)** Quantification of hTERT exon1-2 and exon1-3 splice-junctions in HeLa cells following transfection with ASO. Transfection of HeLa with a splice-blocking ASO reduces the abundance of exon1-2 splicing and increases exon1-3 splicing abundance (n=3 biological replicates, p<0.01, statistics calculated using student's t-test). **(E)** Representative TRAP assay to detect telomerase activity in HeLa cells with the indicated treatment, with 5000, 1000 and 200 cell dilutions shown. **(F)** Graph depicting the quantification of the TRAP assay in **(E)**, only 1000 cell dilution was used for quantification of signal intensity (n=3 biological replicates, p<0.05, statistics calculated using student's t-test).

Figure S4

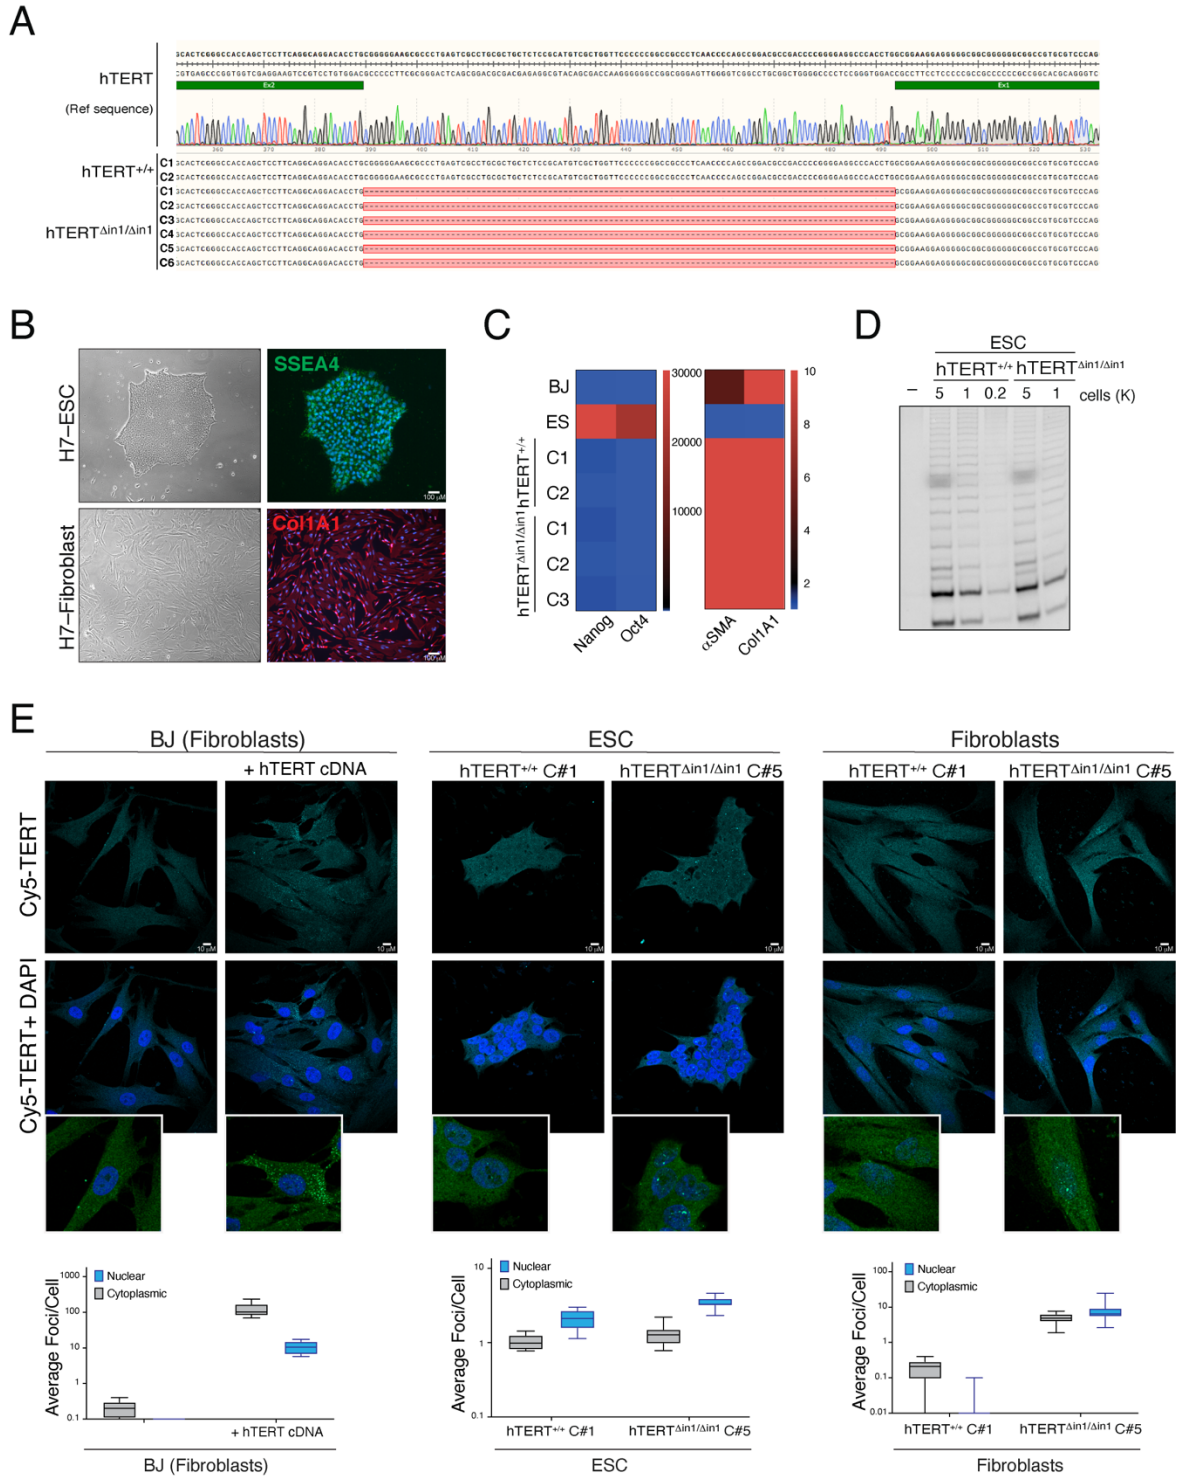



**Figure S4. Characterization of  $hTERT^{\Delta in1/\Delta in1}$  ESCs and differentiated fibroblasts. Related to Figure 4. (A)** Sanger sequencing of two  $hTERT^{+/+}$  and six independent  $hTERT^{\Delta in1/\Delta in1}$  clones. Tracks aligned to reference genome sequence in Snapgene, **(B)** Brightfield images (left) and immunofluorescence images (right) of hESCs (top) and ESC-derived fibroblasts (bottom). ESCs have expected morphology and express the pluripotency-associated cell-surface marker, SSEA4. Differentiated fibroblasts express Col1a1, a marker of differentiated fibroblasts. **(C)** Heatmap of RT-qPCR data from differentiated fibroblasts of two  $hTERT^{+/+}$  and three  $hTERT^{\Delta in1/\Delta in1}$  clones. H7 ESCs and BJ fibroblasts were used as pluripotent and differentiated controls, respectively.  $hTERT^{\Delta in1/\Delta in1}$  and  $hTERT^{+/+}$  fibroblasts downregulate pluripotency genes (Oct4 and Nanog) and upregulate fibroblast identity genes (Col1a1 and  $\alpha$ SMA) to a similar extent. Values are normalized to BJ fibroblast expression (n=3 biological replicates, p<0.001, statistics calculated using ANOVA with multiple comparisons to expression values for BJ fibroblast). **(D)** Representative TRAP assay indicates that  $hTERT^{\Delta in1/\Delta in1}$  ESCs have comparable telomerase activity to  $hTERT^{+/+}$  ESCs, dilutions shown for 5000, 1000, and 200 cells shown. **(E)** Top: Representative images of hTERT-specific smiRNA-FISH. Bottom: quantification of cytoplasmic and nuclear foci in the indicated cell types: mortal BJ fibroblasts (n=55), hTERT-immortalized BJ (n=91),  $hTERT^{+/+}$  ESCs (n=163),  $hTERT^{\Delta in1/\Delta in1}$  ESCs (n=255),  $hTERT^{+/+}$  fibroblasts (n=94), and  $hTERT^{\Delta in1/\Delta in1}$  fibroblasts (n=91).

Figure S5

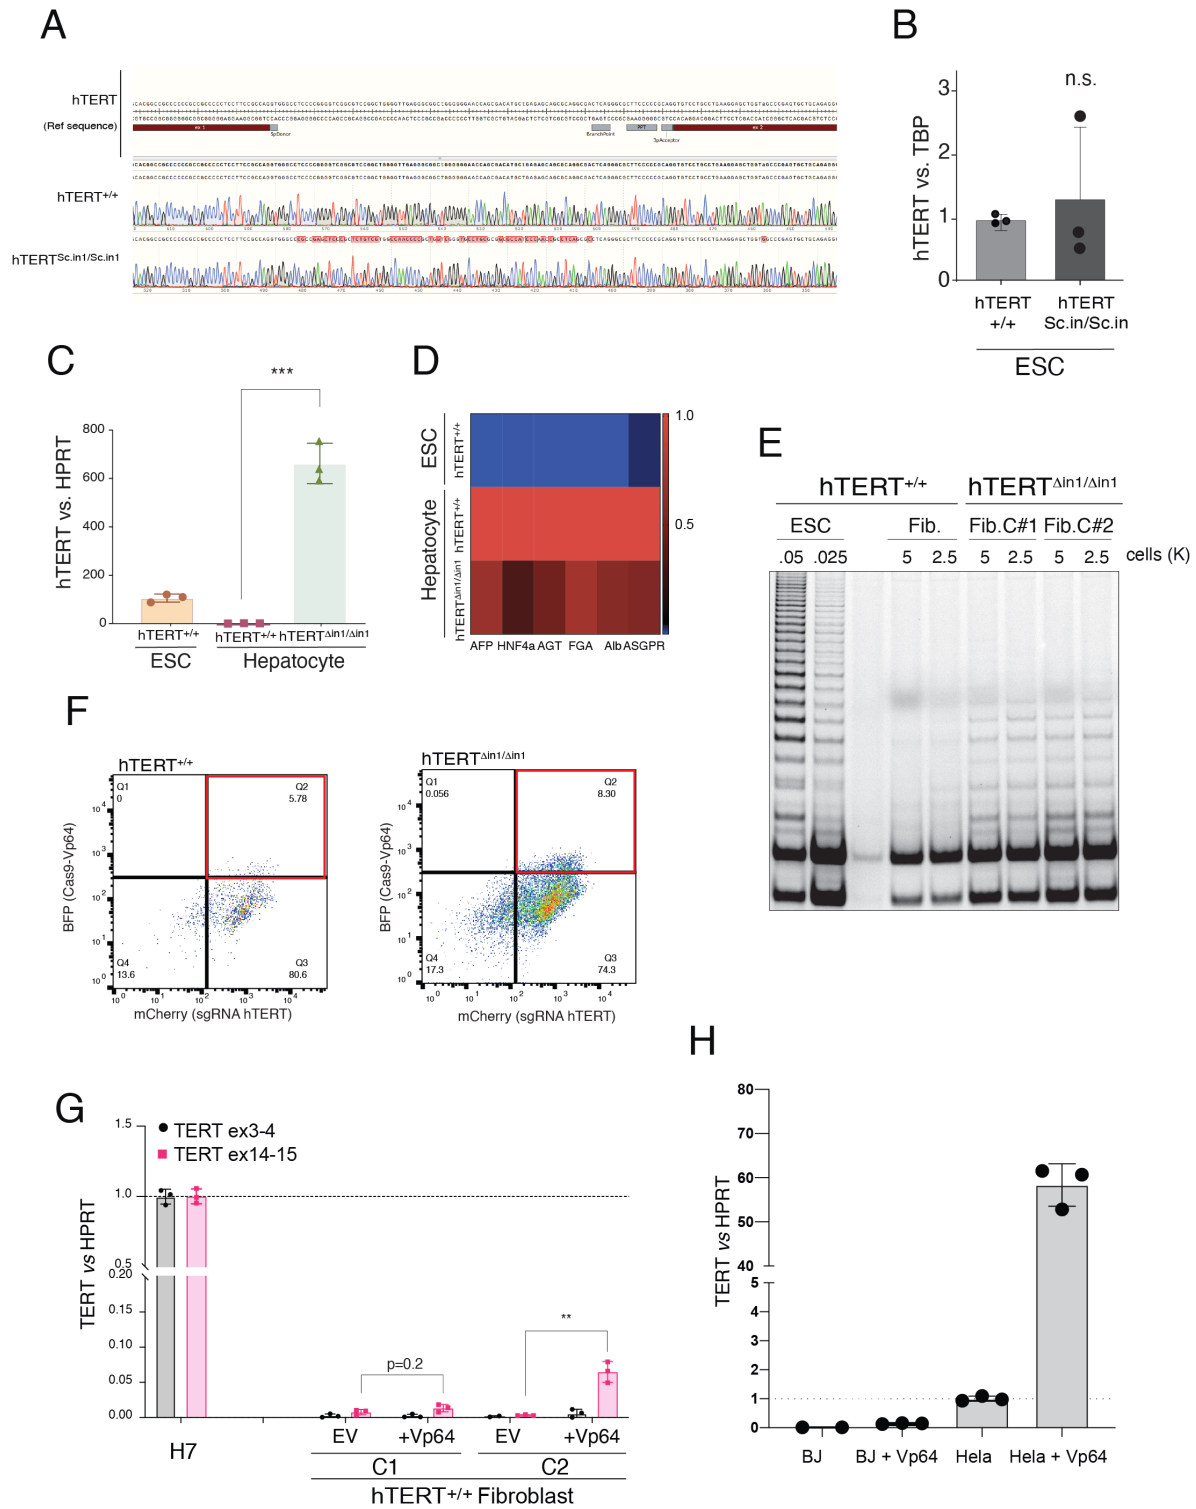

Figure S5. *hTERT*<sup>Δin1/Δin1</sup> cells fail to silence *hTERT*. Related to Figure 4. (A) Sanger sequencing of *hTERT*<sup>+/+</sup> and *hTERT*<sup>Sc.in1/Sc.in1</sup> cells (Sc.in1=scrambled intron 1). Tracks aligned to

reference genome sequence in Snapgene. Scrambled intron sequence has same base composition as WT intron but with randomly arrange nucleotides and conserved sequences required for splicing, T>G mutation in exon-2 was used to ablate PAM site and is a silent substitution. **(B)** Quantitative RT-qPCR for *hTERT* mRNA in ESCs with the indicated genotype. *hTERT* expression is similar in *hTERT<sup>Sc.in1/Sc.in1</sup>* ESCs and wildtype ESCs, indicating that *hTERT* intron-1 does not contain a transcriptional silencer. Values are normalized to those obtained from *hTERT<sup>+/+</sup>* differentiated hepatocytes (n=3 biological replicates, n.s., statistics calculated using student's t-test). **(C)** Quantitative RT-PCR for hTERT mRNA in cells with the indicated genotype during *in-vitro* hepatocyte differentiation (Mallanna and Duncan, 2013). *hTERT* expression is silenced in hepatocytes derived from wildtype H7 ESC clones, whereas, hTERT levels remains elevated upon differentiation of *hTERT<sup>Δin1/Δin1</sup>* ESCs into hepatocytes. Values are normalized to those obtained from *hTERT<sup>+/+</sup>* differentiated hepatocytes (n=3 biological replicates, p<0.001, statistics calculated using student's t-test for indicated pairs). **(D)** Heatmap of RT-qPCR data from differentiated hepatocytes obtained from *hTERT<sup>+/+</sup>* and *hTERT<sup>Δin1/Δin1</sup>* clones. H7 ESCs are used as pluripotent cell control. *hTERT<sup>Δin1/Δin1</sup>* and *hTERT<sup>+/+</sup>* hepatocytes upregulate early hepatic endoderm genes (AFP and HNF4a), mid-development hepatocyte genes (AGT and FGA) and mature hepatocyte genes (Albumin and ASGPR) to a similar extent. Values are normalized to those obtained from *hTERT<sup>+/+</sup>* differentiated hepatocytes (n=3 biological replicates, p<0.001, statistics calculated using ANOVA with multiple comparisons to *hTERT<sup>+/+</sup>* fibroblast values). **(E)** Representative TRAP assay to detect telomerase activity in cells with the indicated genotype. The TRAP confirms that *hTERT<sup>Δin1/Δin1</sup>* fibroblasts retain low-level telomerase activity while *hTERT<sup>+/+</sup>* fibroblasts silence telomerase completely, dilutions of 5000 and 2500 cells shown for fibroblasts and 50 and 25 cells for ESCs. **(F)** FACS plot indicative of Vp64-Cas9 expression (BFP) and sgRNA expression (mCherry) in cells with the indicated genotype upon transduction with the transcriptional activation system. **(G)** RT-qPCR for hTERT mRNA in differentiated fibroblasts upon addition of Vp64-Cas9 transcriptional activation of *hTERT* promoter. Two *hTERT<sup>+/+</sup>* clones were transduced with lentivirus encoding Vp64-dCas9 transactivation protein and 2 guide RNAs complementary to *hTERT* promoter. Following FACS selection of Vp64-dCas9 expressing cells, RT-qPCR was performed on non-transduced parental clonal lines (EV for empty vector) and Vp64-dCas9 expressing cells. Transcriptional activation of hTERT promoter does not robustly increase hTERT mRNA in *hTERT<sup>+/+</sup>* fibroblasts (n=3, p=0.2 and p<0.01). **(H)** RT-qPCR for hTERT mRNA in BJ fibroblasts and HeLa cells upon addition of Vp64-Cas9 transcriptional activation of hTERT promoter.

Figure S6

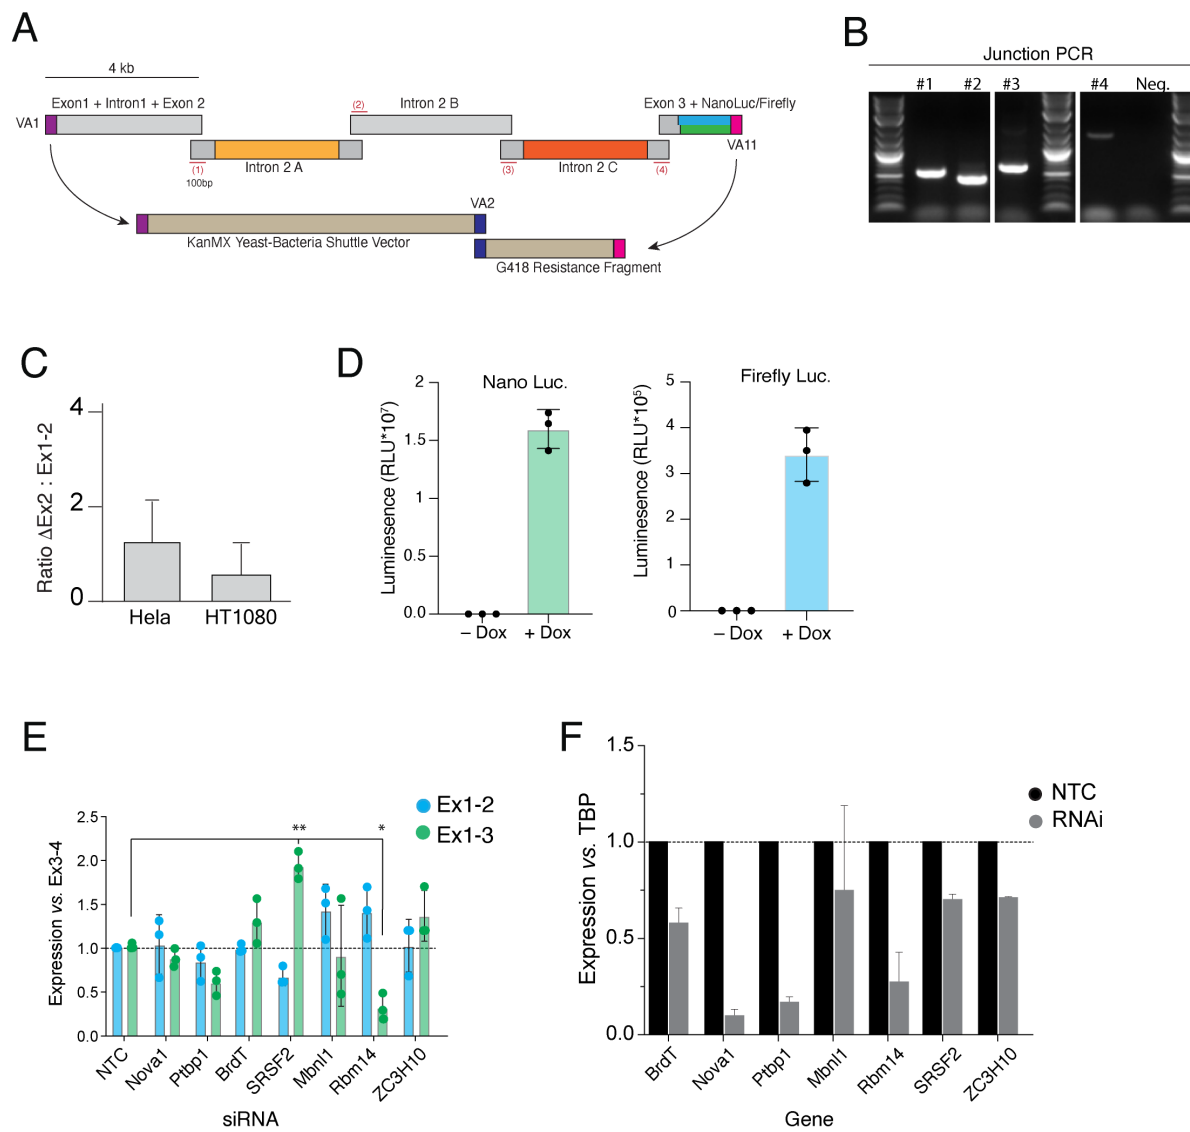

**Figure S6. Minigene reporter screen identifies positive and negative regulators of hTERT alternative splicing. Related to Figure 5. (A)** Schematic illustration of mini-gene assembly by homologous recombination in yeast. Genomic locus for *hTERT* containing exons 1, 2, and 3 and intervening introns was amplified in 4kb amplicons that overlap by at least 100bp. Terminal fragments amended with VA1 and VA11 sequences to facilitate homologous recombination with yeast-bacteria shuttle backbone (KanMX) and Geneticin 418 resistance fragment. After selection for drug resistant colonies in yeast, minigene constructs were cloned into a mammalian expression vector. **(B)** PCR amplification across assembled junctions of *hTERT* minigene, confirming proper assembly of all 4 pieces in the appropriate order. **(C)** Quantification of the hTERT  $\Delta$ Ex2 to hTERT full-length ratio by RT-qPCR in two cancer cell lines, HeLa and HT1080 (n=3 biological replicates). hTERT mRNA in HeLa cells display a ratio near 1:1 for hTERT  $\Delta$ Ex2 to hTERT full-length, indicating that the cell line would be suitable to detect any modulation in alternative splicing. **(D)** Quantification of luciferase signal from each reporter upon Dox induction in HeLa-FRT cell line heterozygous for each reporter construct. In each case, uninduced control wells were used to measure background luminescence and the measured background was subtracted (n=3 biological replicates,  $p < 0.0001$ , statistics calculated by student's t-test). **(E)** Quantification of hTERT exon1-2 and exon1-3 splice-junctions normalized to non-alternatively-spliced junction, exon3-4, in HeLa cells upon knockdown of the indicated top-scoring RNA splicing factors from RNAi screen. Depletion of SRSF2 and RBM14 in HeLa cells significantly changed abundance of exon1-3 and exon1-2 splice junctions. Other factors, including Nova1 and Ptpb1 that were previously showed to influence *hTERT*  $\alpha/\beta$  splicing (Sayed et al., 2019), do not significantly alter hTERT exon-2 alternative splicing. (n=3 biological replicates, \*:  $p < 0.05$ , \*\*:  $p < 0.01$ , statistics calculated using ANOVA with multiple comparisons to NTC values). **(F)** Efficiency of decay factor depletion by RNAi in HeLa in **(E)** by qPCR.

Figure S7

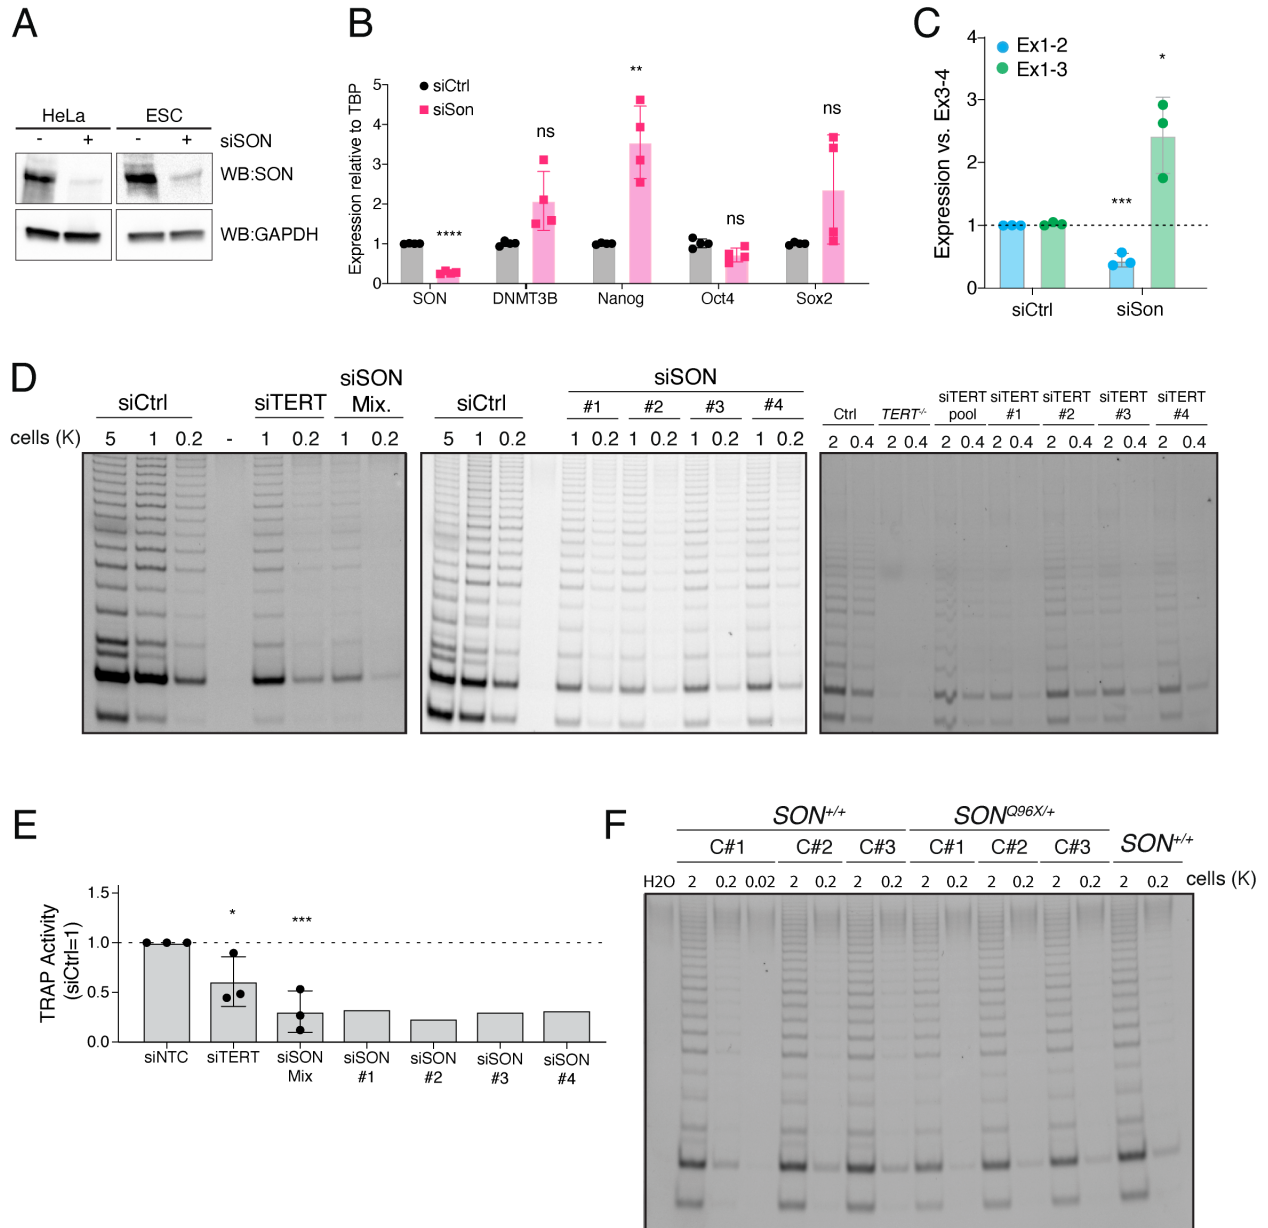

**Figure S7. SON regulates *hTERT* splicing as a function of pluripotency. Related to Figure 6.** (A) Western blot to detect SON levels 48 hours post-transfection of HeLa and human ESCs with siSON (4-oligo pool) and siCtrl (non-targeting control siRNA). (B) Quantification of pluripotency factor (Oct4, Sox2, Nanog, Dnmt3B) and SON mRNA abundance in SON depleted human ESCs by RT-qPCR. Graph depicts a reduction in total SON transcript in human ESCs upon SON knockdown (n=3 biological replicates,  $p < 0.0001$ , statistics calculated using student's t-test). At this time point, we detect no reduction in pluripotency associated genes (n=3 biological replicates, Oct4  $p = 0.08$ , statistics calculated using student's t-test comparing RNAi expression to that of siCtrl for each gene). (D) Representative TRAP assay to detect telomerase activity in HeLa cells, 48 hours after SON depletion with siRNA pool (Mix) or individual siRNAs. (E) Quantification of the TRAP assay as in (D), only 1000 cell dilution was quantified for signal intensity. SON depletion results in a significant reduction in telomerase activity (n=3 biological replicates, \*:  $p < 0.05$ , \*\*:  $p < 0.001$ , statistics calculated using ANOVA with multiple comparisons to siNTC signal intensity values). siSon Mix represents a pool of 4 independent siRNAs. In addition, we tested each siRNA individually in a single experiment (n=1). (F) Representative TRAP assay to detect telomerase activity in human ESCs with the indicated genotype. Lanes quantified were those comprising 2000 cells.

**Supplemental table 1:** List of RNA-binding proteins and splicing factors tested in RNAi screen related to Figure 5B.

|             |             |               |               |             |             |              |             |
|-------------|-------------|---------------|---------------|-------------|-------------|--------------|-------------|
| AAR2        | CWC15       | GTF2F1        | METTL16       | PRMT5       | RNF113<br>B | SNU13        | TXNL4<br>B  |
| ACIN1       | CWC22       | GTF2F2        | METTL3        | PRMT7       | Rnf219      | SNUPN        | U2AF1       |
| AFF2        | CWC25       | HABP4         | MFAP1         | PRPF1<br>8  | RNPC3       | SNW1         | U2AF1L<br>4 |
| AHNAK       | CWC27       | HMX2          | MPHOSP<br>H10 | PRPF1<br>9  | RNPS1       | SON          | U2AF2       |
| AHNAK<br>2  | CWF19<br>L1 | HNRNPA0       | MYOD1         | PRPF3       | RP9         | SREK1        | U2SUR<br>P  |
| AKAP1<br>7A | CWF19<br>L2 | HNRNPA1       | NCBP1         | PRPF3<br>1  | RPS13       | SREK1I<br>P1 | UBL5        |
| AKAP8<br>L  | DAZAP<br>1  | HNRNPA1<br>L2 | NCBP2         | PRPF3<br>8A | RPS26       | SRPK1        | UPF3B       |
| AKT2        | DBR1        | HNRNPA2<br>B1 | NOL3          | PRPF3<br>8B | RRAGC       | SRPK2        | USB1        |
| ALYRE<br>F  | DCPS        | HNRNPA3       | NONO          | PRPF3<br>9  | RRP1B       | SRPK3        | USP39       |
| AQR         | DDX1        | HNRNPC        | NOVA1         | PRPF4       | RSRC1       | SRRM1        | USP4        |
| ARL6IP<br>4 | DDX17       | HNRNPD        | NOVA2         | PRPF4<br>0A | RTCB        | SRRM2        | USP49       |
| BCAS2       | DDX20       | HNRNPF        | Npm1          | PRPF4<br>0B | SAP18       | SRRM4        | WBP11       |
| BRDT        | DDX23       | HNRNPH<br>1   | NSRP1         | PRPF4<br>B  | SART1       | SRRT         | WBP4        |
| BUD13       | DDX39<br>A  | HNRNPH<br>2   | NUDT21        | PRPF6       | SART3       | SRSF1        | WDR33       |
| BUD31       | DDX39<br>B  | HNRNPH<br>3   | NUP98         | PRPF8       | SCAF1       | SRSF1<br>0   | WDR77       |
| C1QBP       | DDX41       | HNRNPK        | PABPC1        | PRX         | SCAF11      | SRSF1<br>1   | WDR83       |
| C2orf49     | DDX42       | HNRNPL        | PABPN1        | PSIP1       | SCAF8       | SRSF1<br>2   | WT1         |
| C9orf78     | DDX46       | HNRNPLL       | PAPOLA        | PTBP1       | SCNM1       | SRSF2        | WTAP        |
| CACTI<br>N  | DDX47       | HNRNPM        | PCBP1         | PTBP2       | SETX        | SRSF3        | XAB2        |
| CASC3       | DDX5        | HNRNPR        | PCBP2         | PTBP3       | SF1         | SRSF4        | YBX1        |
| CCAR1       | DHX15       | HNRNPU        | Pcbp4         | PUF60       | SF3A1       | SRSF5        | YTHDC<br>1  |
| CCAR2       | DHX16       | HNRNPU<br>L1  | PCF11         | QKI         | SF3A2       | SRSF6        | ZBTB7<br>A  |
| CD2BP<br>2  | DHX35       | HSPA1A        | PDCD7         | RALY        | SF3A3       | SRSF7        | ZBTB8<br>OS |
| CDC40       | DHX38       | HSPA8         | PHF5A         | RBFOX<br>1  | SF3B1       | SRSF8        | ZC3H10      |
| CDC5L       | DHX40       | HTATSF1       | PIK3R1        | RBFOX<br>2  | SF3B2       | SRSF9        | ZC3H13      |



|        |         |          |          |        |          |         |         |
|--------|---------|----------|----------|--------|----------|---------|---------|
| CDK12  | DHX8    | IK       | PLRG1    | RBFOX3 | SF3B3    | STH     | ZCCHC8  |
| CDK13  | DHX9    | ISY1     | PNN      | RBM10  | SF3B4    | STRAP   | ZCRB1   |
| CELF1  | DNAJC8  | IVNS1ABP | POLR2A   | RBM11  | SF3B5    | SUGP1   | ZMAT2   |
| CELF2  | DYRK1A  | IWS1     | POLR2B   | RBM15  | SF3B6    | SUGP2   | ZMAT5   |
| CELF3  | ECD     | JMJD6    | POLR2C   | RBM15B | SFPQ     | SUPT6H  | ZNF326  |
| CELF4  | EFTUD2  | KDM1A    | POLR2D   | RBM17  | SFSWAP   | SYF2    | ZNF638  |
| CELF5  | EIF4A3  | KHDRBS1  | POLR2E   | RBM19  | SLC39A5  | SYMPK   | ZNF830  |
| CELF6  | ELAVL1  | KHDRBS2  | POLR2F   | RBM20  | SLU7     | SYNCRIP | ZPR1    |
| CHERP  | ELAVL2  | KHDRBS3  | POLR2G   | RBM22  | SMNDC1   | TAF15   | ZRANB2  |
| CIR1   | ERN1    | KHSRP    | POLR2H   | RBM24  | SMU1     | TARDBP  | ZRSR2   |
| CIRBP  | ESRP1   | LGALS3   | POLR2I   | RBM25  | SNIP1    | TFIP11  | RBM14   |
| CLASRP | ESRP2   | Lmntd2   | POLR2J   | RBM28  | SNRNP200 | TGS1    | FUBP1   |
| CLK1   | FAM172A | LSM1     | POLR2K   | RBM3   | SNRNP25  | THOC1   | CCDC130 |
| CLK2   | FAM98B  | LSM10    | POLR2L   | RBM38  | SNRNP27  | THOC2   | EWSR1   |
| CLK3   | FASTK   | LSM2     | PPARGC1A | RBM39  | SNRNP35  | THOC3   | USP43   |
| CLK4   | FIP1L1  | LSM3     | PPIE     | RBM4   | SNRNP40  | THOC5   | PCBP3   |
| CLNS1A | FMR1    | LSM4     | PPIG     | RBM41  | SNRNP48  | THOC6   | CCDC94  |
| CLP1   | FRG1    | LSM5     | PPIH     | RBM42  | SNRNP70  | THOC7   | RAVER2  |
| COIL   | FUS     | LSM6     | PPIL1    | RBM4B  | SNRPA    | THRAP3  | IGF2BP2 |
| CPSF1  | FXR1    | LSM7     | PPIL3    | RBM5   | SNRPA1   | TIA1    | RBPM2   |
| CPSF2  | FXR2    | LSM8     | PPP1R8   | RBM7   | SNRPB    | TMBIM6  | RAVER1  |
| CPSF3  | GCFC2   | LUC7L    | PPP1R9B  | RBM8A  | SNRPB2   | TRA2A   | USP31   |
| CPSF4  | GEMIN2  | LUC7L2   | PPP2CA   | RBMX   | SNRPC    | TRA2B   | NCL     |
| CPSF7  | GEMIN4  | LUC7L3   | PPP2R1A  | RBMX2  | SNRPD1   | TRPT1   | IGF2BP3 |
| CRNKL1 | GEMIN5  | MAGOH    | PPP4R2   | RBMXL1 | SNRPD2   | TSEN15  | FUBP3   |
| CSTF1  | GEMIN6  | MAGOHB   | PPWD1    | RBMXL2 | SNRPD3   | TSEN2   | IGF2BP1 |

|                     |             |         |         |             |       |            |             |
|---------------------|-------------|---------|---------|-------------|-------|------------|-------------|
| <b>CSTF2</b>        | GEMIN<br>7  | MBNL1   | PQBP1   | RBMXL<br>3  | SNRPE | TSEN3<br>4 | RBPMS       |
| <b>CSTF2<br/>T</b>  | GEMIN<br>8  | MBNL2   | PRCC    | RBMX1<br>F  | SNRPF | TSEN5<br>4 | PSPC1       |
| <b>CSTF3</b>        | GPATC<br>H1 | MBNL3   | PRDX6   | REST        | SNRPG | TTF2       | METTL<br>25 |
| <b>CTNNB<br/>L1</b> | GPKO<br>W   | METTL14 | PRKRIP1 | RNF11<br>3A | SNRPN | TXNL4<br>A | FTO         |

**Supplemental table 3:** List of Antibodies used throughout the study. Related to STAR Methods

| <b>Primary Antibodies</b>       | <b>Host</b> | <b>Company</b>      | <b>Catalogue</b> | <b>Dilution</b> |
|---------------------------------|-------------|---------------------|------------------|-----------------|
| GAPDH (0411)                    | Mouse       | Santa Cruz Biotech. | sc-47724         | 1:10000 (WB)    |
| SSEA-4 (MC-813-70)              | Mouse       | R&D Systems         | MAB1435          | 1:500 (IF)      |
| COL1A1 (3G3)                    | Mouse       | Santa Cruz Biotech. | sc-293182        | 1:500 (IF)      |
| SON                             | Rabbit      | Novus Biologicals   | NBP1-88706       | 1:1000 (WB)     |
| <b>Secondary Antibodies</b>     | <b>Host</b> | <b>Company</b>      | <b>Catalogue</b> | <b>Dilution</b> |
| Mouse IgG, HRP-linked whole Ab  | Sheep       | GE Amersham         | NA931V           | 1:5000 (WB)     |
| Rabbit IgG, HRP-linked whole Ab | Donkey      | GE Amersham         | NA934V           | 1:5000 (WB)     |
| Alexa Fluor 488 (D-anti-M)      | Donkey      | Life Technologies   | A-21202          | 1:500 (IF)      |
| Alexa Fluor 568 (D-anti-M)      | Donkey      | Life Technologies   | A-10037          | 1:500 (IF)      |
